# Supplementary material
Source: PubMed Central journal article supplement (PMC11249686)
Supplement: boe-15-7-4024-s001.pdf [file boe-15-7-4024-s001.pdf]

## Multimodal analysis of traction forces and the temperature dynamics of living cells with a diamond-embedded substrate: supplement

**TOMASZ KOŁODZIEJ,<sup>1,2</sup>  MARIUSZ MRÓZEK,<sup>2</sup>  SARAVANAN SENGOTTUVEL,<sup>2,3</sup>  MACIEJ J. GŁOWACKI,<sup>4</sup>  MATEUSZ FICEK,<sup>4</sup>  WOJCIECH GAWLIK,<sup>2</sup>  ZENON RAJFUR,<sup>2,5</sup>  AND ADAM M. WOJCIECHOWSKI<sup>2,6</sup> **

<sup>1</sup>Jagiellonian University Medical School, Faculty of Pharmacy, Kraków, Poland

<sup>2</sup>Jagiellonian University, Faculty of Physics, Astronomy, and Applied Computer Science, Kraków, Poland

<sup>3</sup>Jagiellonian University, Doctoral School of Exact and Natural Sciences, Kraków, Poland

<sup>4</sup>Gdansk University of Technology, Faculty of Electronics, Telecommunications, and Informatics, Department of Metrology and Optoelectronics, Gdańsk, Poland

<sup>5</sup>zenon.rajfur@uj.edu.pl

<sup>6</sup>a.wojciechowski@uj.edu.pl

---

This supplement published with Optica Publishing Group on 3 June 2024 by The Authors under the terms of the [Creative Commons Attribution 4.0 License](https://creativecommons.org/licenses/by/4.0/) in the format provided by the authors and unedited. Further distribution of this work must maintain attribution to the author(s) and the published article's title, journal citation, and DOI.

Supplement DOI: <https://doi.org/10.6084/m9.figshare.25735506>

Parent Article DOI: <https://doi.org/10.1364/BOE.524293>

**MULTIMODAL ANALYSIS OF TRACTION FORCES AND TEMPERATURE DYNAMICS OF LIVING CELLS WITH DIAMOND-EMBEDDED SUBSTRATE: SUPPLEMENTAL DOCUMENT**

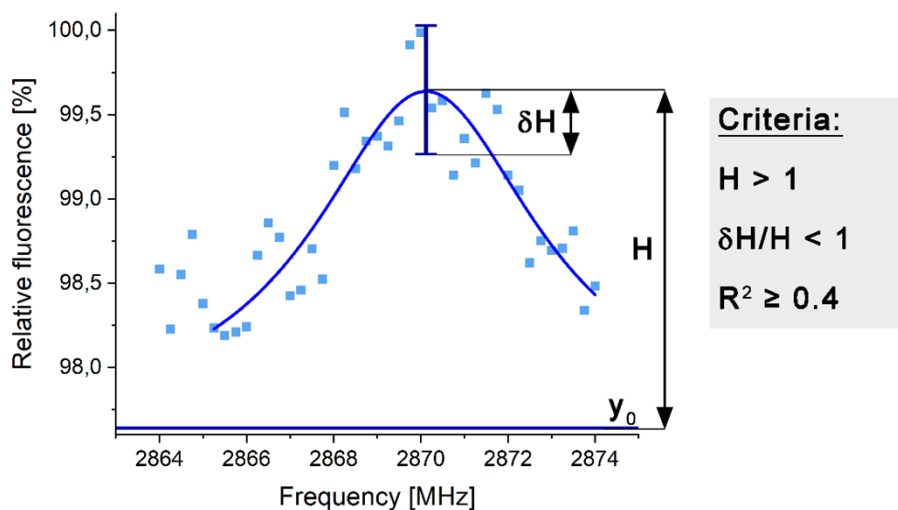

Fig. S1. Criteria for including the ODMR spectrum of a particular microdiamond. The height of the central dip ( $H$ ) should be visible enough, i.e. show at least 1% of relative fluorescence. The uncertainty of height ( $\delta H$ ) should not be higher than the height itself ( $\delta H/H < 1$ ) and the fitted function should show a minimal agreement with data ( $R^2 > 0.4$ ). These criteria allow for elucidating even the weakest ODMR signals present in the field of view.

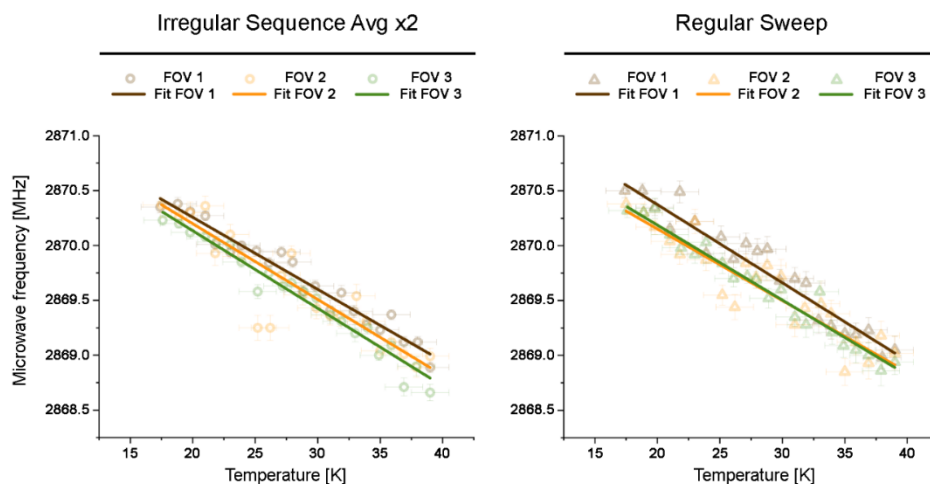

Fig. S2. Temperature calibration of the ODMR-TFM substrate. The left plot shows the three experimental series for an irregular sequence ( $t = 2.5$  s), whereas the right plot shows the ODMR calibration for a regular sweep ( $t = 5.1$  s).

**Table S3. Slopes of linear functions fitted to the temperature calibration data in Fig. S2.**

|            | Irregular seq. avg. $\times 2$ |                | Regular sweep   |                |
|------------|--------------------------------|----------------|-----------------|----------------|
|            | Slope [kHz/K]                  | R <sup>2</sup> | Slope [kHz/K]   | R <sup>2</sup> |
| Position 1 | $-65.6 \pm 3.0$                | 0.96040        | $-71.2 \pm 3.8$ | 0.94498        |
| Position 2 | $-69.0 \pm 5.3$                | 0.89545        | $-65.2 \pm 5.6$ | 0.87062        |
| Position 3 | $-70.7 \pm 2.7$                | 0.97225        | $-68.3 \pm 3.2$ | 0.95796        |
| Averaged   | $-68.4 \pm 3.6$                | ---            | $-68.2 \pm 4.2$ | ---            |
